# Supplementary material
Source: PubMed Central journal article supplement (PMC6446042)

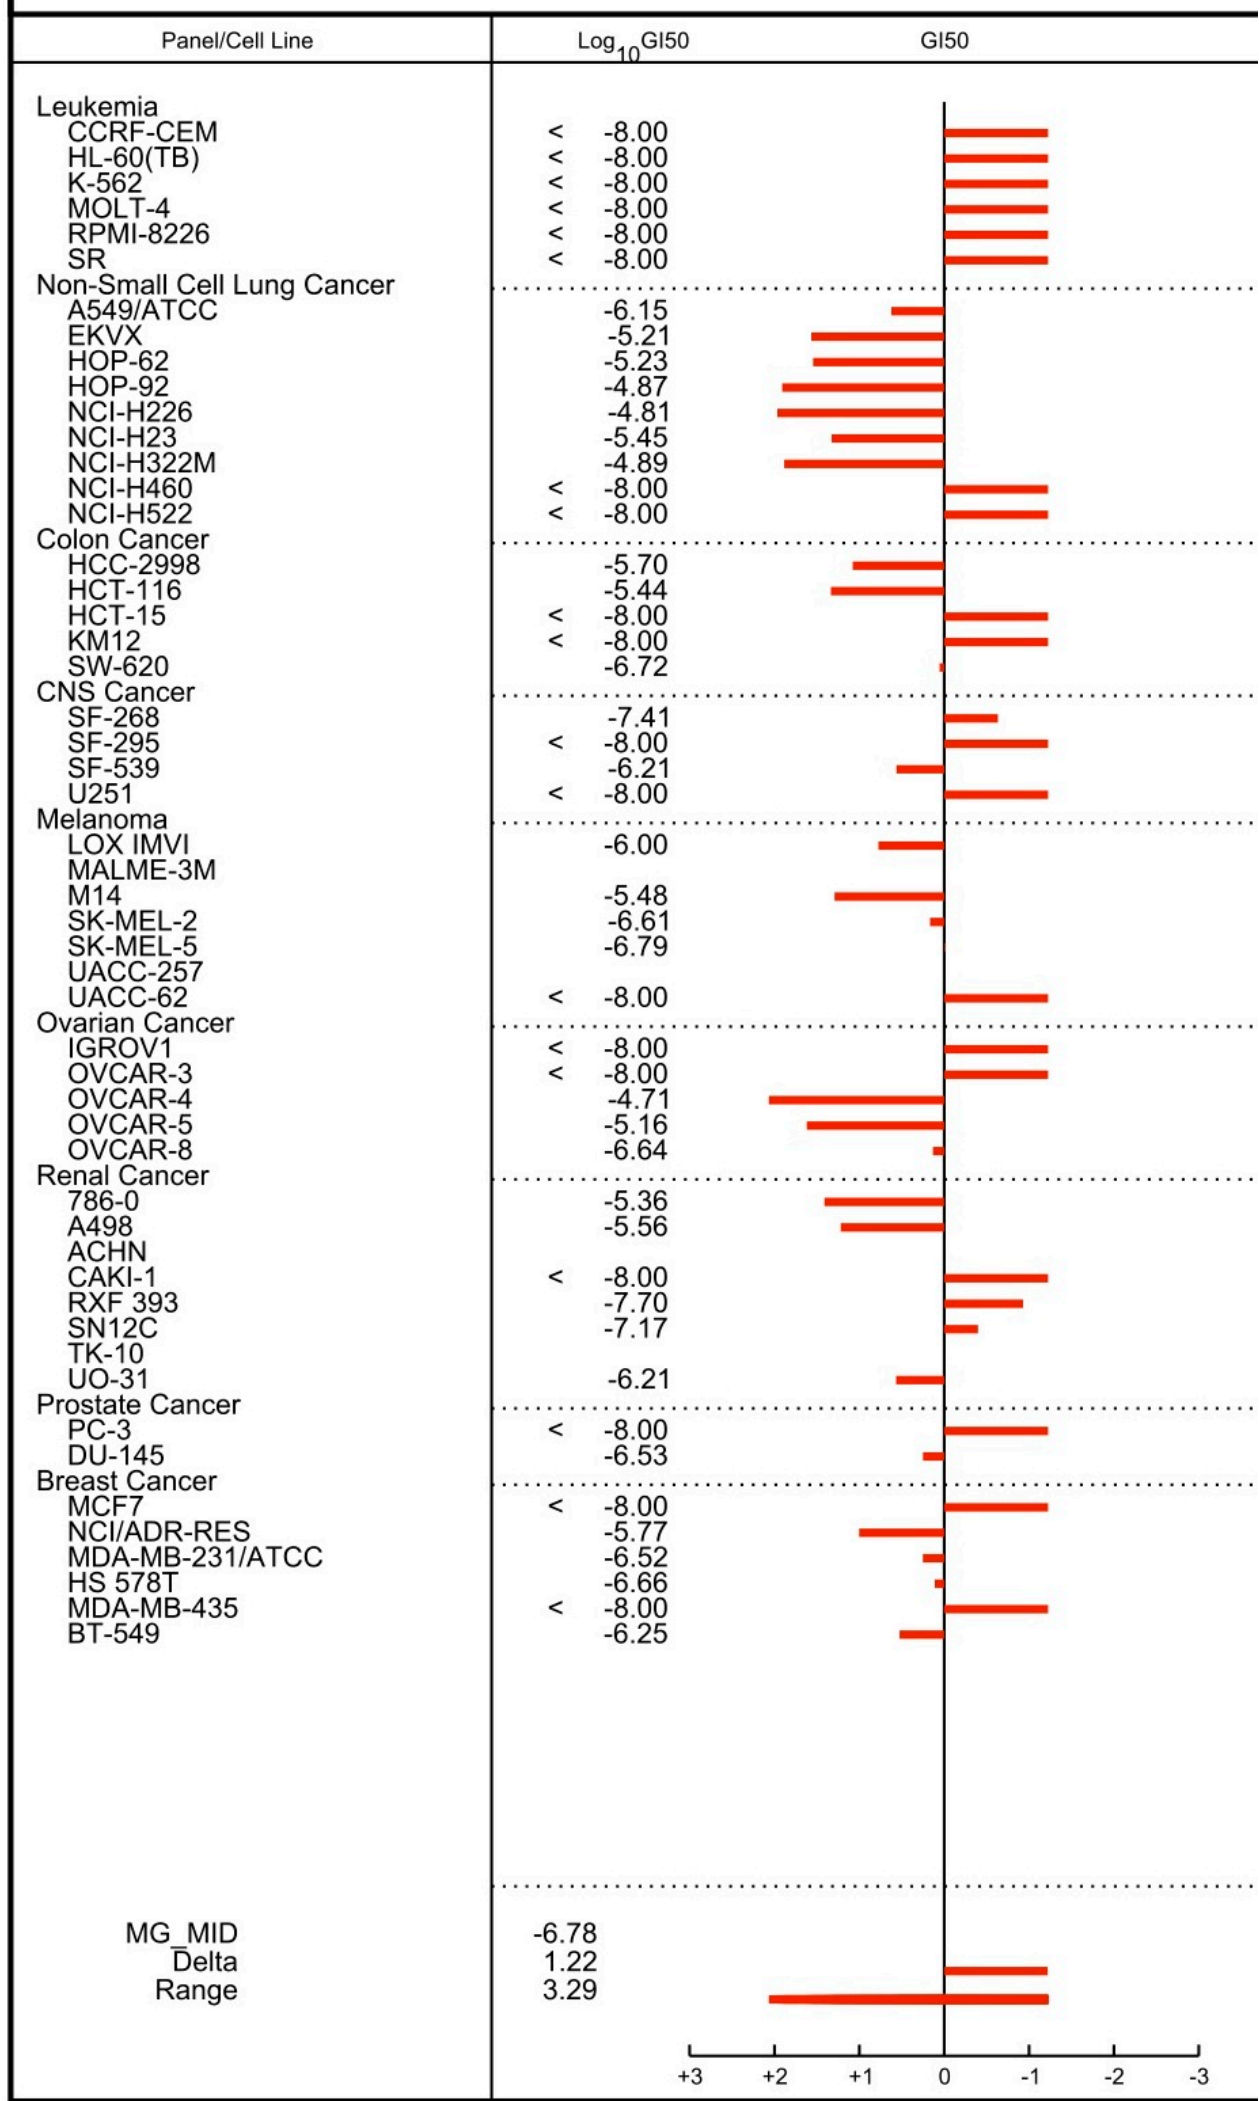

Supplement: NIHMS1008821-supplement-Supplementary.pdf [file NIHMS1008821-supplement-Supplementary.pdf]
